# Supplementary material for: Deciphering the Genome-Wide Transcriptomic Changes during Interactions of Resistant and Susceptible Genotypes of American Elm with Ophiostoma novo-ulmi
Source: MDPI journal article supplement (doi:10.3390/jof8020120), 2022-01-26
Supplement: s1 [file s1]

**Table S1:** qRT-PCR primers used in this study.

| Gene Description             | Gene Bank Accession Number | Forward and reverse sequence (5'-3')        |
|------------------------------|----------------------------|---------------------------------------------|
| Senescence-associated        | Unigene_078107             | ACCTGATGCGGTGATGAGT<br>GGACGGTCCTTGAAAATCC  |
| S-locus lectin kinase family | Unigene_033280             | CACTGTCGCAGCATGAAAC<br>CAGGGGCTAGAGCATCGTA  |
| Thaumatococcus               | Unigene_027705             | CAATCTTCCCGTTTTTCGTG<br>AGGGCACAAATCGTTCAAA |
| Disease resistance RPP3      | Unigene_065957             | GGCATCATCAACCTCTTGG<br>CTCGCCAGCTTATCCACAT  |
| Photosystem II, D2           | Unigene_045844             | CGTCGTGATCGATTTCGTTT<br>CCTGTAAGCCAGCCACCTA |
| Rubisco, large subunit       | Unigene_014970             | CGTGCCCTAAGATTGGAAG<br>TTGTCACGCTCAACCTGAA  |
| Photosystem I P700, apo A2   | Unigene_000664             | GTTGCTCCAGGCAACAAAC<br>TCGACTGGAAGACCGAGAG  |
| Splicing factor 3B-F         | FC325436                   | TTCCCCCTGAAAGAGAGGA<br>CAACCAACCGGATTTTCAG  |
